# Supplementary material for: Immunoinformatic Analysis to Identify Proteins to Be Used as Potential Targets to Control Bovine Anaplasmosis
Source: Int J Microbiol. 2020 Aug 27;2020:8882031. doi: 10.1155/2020/8882031 (PMC7474394; doi:10.1155/2020/8882031)
Supplement: Supplementary Materials — Table S1: proteins present in seven Mexican strains of Anaplasma marginale with immunogenic properties predicted by in silico analysis. [file 8882031.f1.xlsx]

## Sheet: Table-1_All
			MEX-01-001-01		MEX-14-010-01		MEX-15-099-01		MEX-17-017-01		MEX-30-184-02		MEX-30-193-01		MEX -31-096-01
		Protein name	Protein product	Length (aa)	Protein product	Length (aa)	Protein product	Length (aa)	Protein product	Length (aa)	Protein product	Length (aa)	Protein product	Length (aa)	Protein product	Length (aa)
	1	membrane protein insertase YidC	WP_010267425.1	647	WP_149145607.1	647	KAA8473132.1	647	KAB0453353.1	647	KAB0452833.1	647	KAB0451492.1	647	KAA8475262.1	647
	2	PleD family two-component system response regulator	WP_010267432.1	455	WP_023386688.1	455	KAA8473141.1	455	KAB0453344.1	455	KAB0452824.1	455	KAB0451501.1	455	KAA8475253.1	455
	3	tRNA (adenosine(37)-N6)-threonylcarbamoyltransferase complex dimerization subunit type 1 TsaB	WP_012658927.1	197	WP_012658927.1	197	KAA8473170.1	197	KAB0453315.1	197	KAB0452798.1	197	KAB0451530.1	197	KAA8475225.1	197
	4	YihY/virulence factor BrkB family protein	WP_011114332.1	295	WP_023386736.1	295	KAA8473189.1	295	KAB0453294.1	295	KAB0452777.1	295	KAB0451551.1	295	KAA8475204.1	295
	5	2-oxoglutarate dehydrogenase E1 component	WP_114211622.1	930	WP_149145619.1	930	KAA8473094.1	930	KAB0453393.1	930	KAB0452872.1	930	KAB0451454.1	930	KAA8475299.1	930
	6	pyruvate dehydrogenase complex dihydrolipoamide acetyltransferase	WP_010266253.1	433	WP_010266253.1	433	KAA8472933.1	433	KAB0453172.1	433	KAB0452499.1	433	KAB0450690.1	433	KAA8475043.1	433
	7	complex I NDUFA9 subunit family protein	WP_010266620.1	326	WP_010266620.1	326	KAA8472837.1	326	KAB0453074.1	326	KAB0452598.1	326	KAB0451123.1	326	KAA8474945.1	326
	8	tRNA (adenosine(37)-N6)-threonylcarbamoyltransferase complex ATPase subunit type 1 TsaE	WP_010268962.1	151	WP_010268962.1	151	KAA8472879.1	151	KAB0453115.1	151	KAB0452557.1	151	KAB0451164.1	151	KAA8474987.1	151
	9	murein biosynthesis integral membrane protein MurJ	WP_037330806.1	501	WP_023441506.1	501	KAA8472909.1	501	KAB0453145.1	501	KAB0452526.1	501	KAB0450398.1	501	KAA8475018.1	501
	10	outer membrane protein assembly factor BamA	WP_114211734.1	779	WP_037330789.1	779	KAA8472540.1	779	KAB0452636.1	779	KAB0452199.1	779	KAB0450961.1	779	KAA8474510.1	779
	11	OmpA family protein	WP_010265113.1	236	WP_010265113.1	236	KAA8472654.1	236	KAB0452957.1	236	KAB0452324.1	236	KAB0451228.1	236	KAA8474755.1	236
	12	OmpH family outer membrane protein	WP_035018087.1	186	WP_023441490.1	186	KAA8472541.1	186	KAB0452637.1	186	KAB0452200.1	186	KAB0450962.1	186	KAA8474509.1	186
	13	outer membrane lipoprotein arrier protein LolA	WP_023386950.1	204	WP_023386950.1	204	KAA8472520.1	204	KAB0452616.1	204	KAB0452180.1	204	KAB0450940.1	204	KAA8474531.1	204
	14	pyruvate dehydrogenase (acetyl-transferring) E1 component subunit alpha	WP_010266989.1	372	WP_023386537.1	372	KAA8472161.1	372	KAB0451961.1	372	KAB0451003.1	372	KAB0450422.1	372	KAA8473488.1	372
	15	pyruvate dehydrogenase complex E1 component subunit beta	WP_012659159.1	341	WP_011114694.1	341	KAA8472305.1	341	KAB0451737.1	341	KAB0451340.1	341	KAB0450473.1	341	KAA8473799.1	341
	16	succinate dehydrogenase, hydrophobic membrane anchor protein	WP_010263158.1	109	WP_010263158.1	109	KAA8472422.1	109	KAB0452258.1	109	KAB0451832.1	109	KAB0450817.1	109	KAA8474608.1	109
	17	ComEC family competence protein	WP_114211810.1	748	WP_023386887.1	748	KAA8472216.1	748	KAB0451396.1	748	KAB0451624.1	748	KAB0450522.1	748	KAA8474007.1	748
	18	ribonuclease P protein component	WP_010265227.1	141	WP_023386885.1	141	KAA8472218.1	141	KAB0451398.1	141	KAB0451622.1	141	KAB0450520.1	141	KAA8474009.1	141
	19	ETC complex I subunit	WP_010262624.1	96	WP_010262538.1	151	KAA8472165.1	96	KAB0451957.1	96	KAB0450999.1	96	KAB0450436.1	96	KAA8473499.1	96
	20	outer membrane lipid asymmetry maintenance protein MlaD	WP_010262538.1	151	WP_010262624.1	96	KAA8472037.1	151	KAB0451223.1	151	KAB0451287.1	151	KAB0450364.1	151	KAA8473279.1	151
	21	outer membrane protein assembly factor BamD	WP_037330756.1	309	WP_149145724.1	309	KAA8472767.1	309	KAB0452417.1	309	KAB0451910.1	309	KAB0451058.1	309	KAA8473409.1	309
	22	Multispecies: outer membrane protein (tolC)	WP_037352972.1	408	WP_010265842.1	408	KAA8472779.1	408	WP_010265842.1	408	WP_010265842.1	408	WP_010265842.1	4.08	KAA8473692.1	408
